# Supplementary figures and images for: Potential Research Tool of Stem Cells from Human Exfoliated Deciduous Teeth: Lentiviral Bmi-1 Immortalization with EGFP Marker
Source: Hindawi journal article supplement (doi:10.1155/2019/3526409), 2019-03-10

A

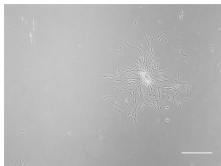

B

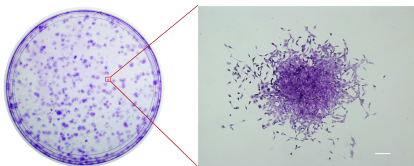

C

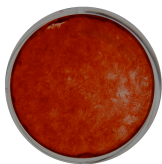

D

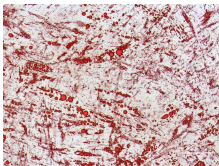

E

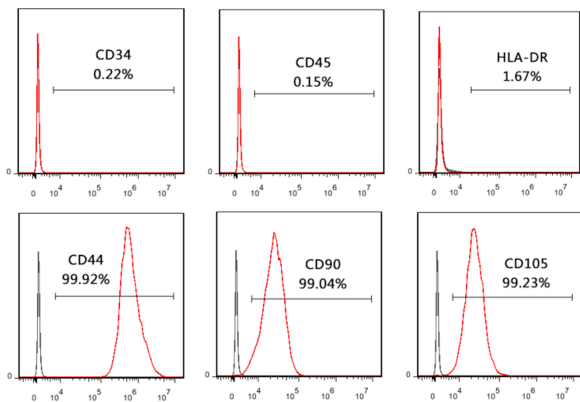

CD34

CD45

HLA-DR

CD44

CD90

CD105

0.22

0.15

1.67%

99.92%

99.04%

99.23%

Supplement: f1 [file 3526409.f1.ai]
